# Supplementary material for: The Distribution of Autoantibodies by Age Group in Children with Type 1 Diabetes versus Type 2 Diabetes in Southern Vietnam
Source: MDPI journal article supplement (doi:10.3390/jcm12041420), 2023-02-10
Supplement: s1 [file s1]

**Supplementary Table S1.** Clinical characteristics of pediatric patients with T1D whose ICAs and GADAs are both negative and at least one positive.

| Clinical characteristics<br>(mean $\pm$ SD)/ <i>n</i> (%) | (-) ICAs &<br>(-) GADAs<br>( <i>n</i> =16 ) | At least one<br>positive Ab<br>( <i>n</i> =61) | <i>P</i> -value*         |
|-----------------------------------------------------------|---------------------------------------------|------------------------------------------------|--------------------------|
| Ages (yrs)                                                | 8.13 $\pm$ 4.41                             | 8.72 $\pm$ 3.76                                | 0.587                    |
| Symptoms                                                  |                                             |                                                |                          |
| Polydipsia, yes                                           | 10 (62.5)                                   | 52 (85.2)                                      | 0.071 <sup>#</sup>       |
| Polyuria, yes                                             | 10 (62.5)                                   | 54 (88.5)                                      | <b>0.023<sup>#</sup></b> |
| Polyphagia, yes                                           | 5 (31.5)                                    | 25 (41.0)                                      | 0.572                    |
| Unintended weight loss                                    | 9 (56.2)                                    | 53 (86.9)                                      | <b>0.011<sup>#</sup></b> |
| Height (cm)                                               | 117.15 $\pm$ 25.71                          | 125.43 $\pm$ 20.56                             | 0.178                    |
| Body weight (kg)                                          | 23.45 $\pm$ 10.62                           | 23.86 $\pm$ 8.80                               | 0.873                    |
| BMI (kg/m <sup>2</sup> )                                  | 11.15 $\pm$ 5.05                            | 11.35 $\pm$ 4.18                               | 0.873                    |
| BMI-for-age (Z-score)                                     | -0.44 $\pm$ 1.83                            | -1.32 $\pm$ 1.55                               | 0.056                    |
| On insulin at diagnosis, yes (n, %)                       | 6 (37.5)                                    | 14 (23.0)                                      | 0.336 <sup>#</sup>       |
| DKA at diagnosis                                          | 7 (43.8)                                    | 13 (21.3)                                      | 0.107 <sup>#</sup>       |
| Blood glucose at diagnosis (mg/dL)                        | 446.43 $\pm$ 174.68                         | 412.68 $\pm$ 166.34                            | 0.477                    |
| Glycosuria, yes (n, %)                                    | 15 (93.8)                                   | 57 (93.4)                                      | 1.000 <sup>#</sup>       |
| Urine ketone, yes (n, %)                                  | 15 (93.8)                                   | 57 (93.4)                                      | 1.000 <sup>#</sup>       |
| Hemoglobin A <sub>1c</sub> (%)                            | 11.77 $\pm$ 2.46                            | 12.51 $\pm$ 2.54                               | 0.308                    |
| Plasma insulin ( $\mu$ U/ml)                              | 2.58 $\pm$ 0.89                             | 2.99 $\pm$ 1.77                                | 0.382                    |
| C-peptide (ng/ml)                                         | 0.41 $\pm$ 0.35                             | 0.43 $\pm$ 0.26                                | 0.784                    |

\*X<sup>2</sup> for categorical variables and Student's *t*-test for continuous variables.

<sup>#</sup> Fisher's exact test for categorical variables.

Statistical significance is indicated by bold text.

Abbreviation: BMI body mass index, DKA diabetes ketoacidosis, ICAs, islet cell antibodies; GADAs, glutamic acid decarboxylase antibodies
